# Supplementary material for: Insight into the thermal stability of DNA in hydrated ionic liquids from multi-wavelength UV resonance Raman experiments
Source: Royal Society of Chemistry journal article supplement (doi:10.1039/d1cp01970h), 2021-01-01
Supplement: d1cp01970h1.pdf [file d1cp01970h1.pdf]

ARTICLE

## An insight into thermal stability of DNA in hydrated ionic liquids from multi-wavelengths UV Resonance Raman experiments

Received 00th January 20xx,  
Accepted 00th January 20xx

Barbara Rossi,<sup>\*a,b</sup> Mariagrazia Tortora<sup>a, c</sup>, Sara Catalini<sup>d</sup>, Jacopo Vigna<sup>b</sup>, Ines Mancini<sup>b</sup>, Alessandro Gessini<sup>a</sup>, Claudio Masciovecchio<sup>a</sup> and Andrea Mele<sup>e</sup>

DOI: 10.1039/x0xx00000x

Abstract text goes here. The abstract should be a single paragraph that summarises the content of the article

### A Supporting information

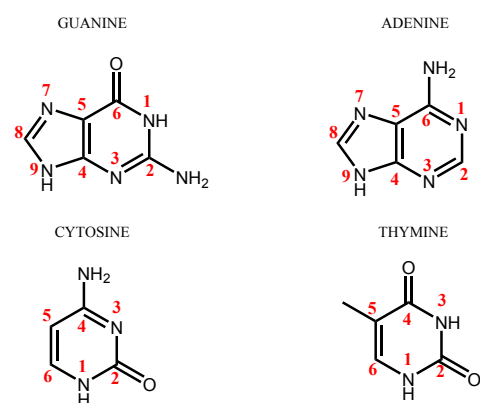

Figure S1: structure and numbering conventions adopted for nucleotides guanine (dG), adenine (dA), cytosine (dC) and thymine (dT).

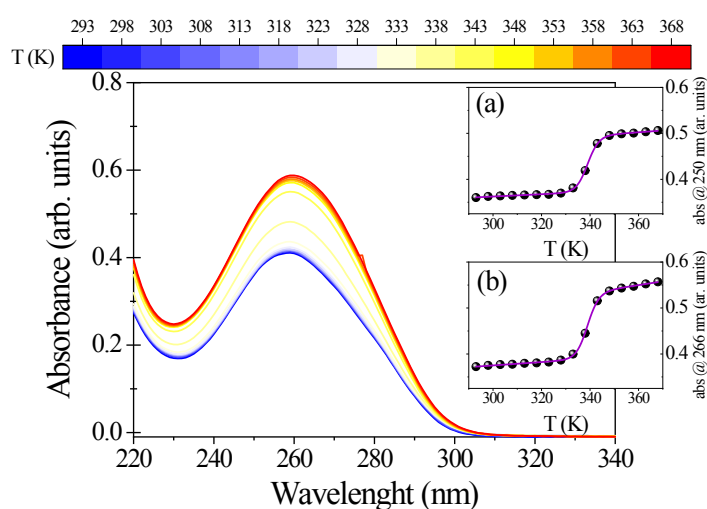

Figure S2: UV absorption spectra of sDNA (0.02 μM in Tris 10 mM pH 7.4) as a function of temperature. Insets: temperature-dependent UV absorbance of sDNA at 250 nm (a) and at 266 nm (b); the continuous violet lines are fitting of the experimental data obtained as described in the text.

<sup>a</sup> Elettra-Sincrotrone Trieste, S.S. 114 km 163.5, Basovizza, 34149, Trieste, Italy

<sup>b</sup> Laboratory of Bioorganic Chemistry, Department of Physics, University of Trento, Via Sommarive, 14 - 38123 Povo Trento, Italy

<sup>c</sup> AREA SCIENCE PARK, Padriciano, 99, 34149 Trieste, Italy

<sup>d</sup> European Laboratory for Non-Linear Spectroscopy, LENS, Via Nello Carrara, 1, 50019, Sesto Fiorentino, Firenze, Italy

<sup>e</sup> Department of Chemistry, Materials and Chemical Engineering "G. Natta", Politecnico di Milano, Piazza L. da Vinci 32, 20133, Milano, Italy

\* correspond to: barbara.rossi@ettra.eu

Electronic Supplementary Information (ESI) available: [details of any supplementary information available should be included here]. See DOI: 10.1039/x0xx00000x

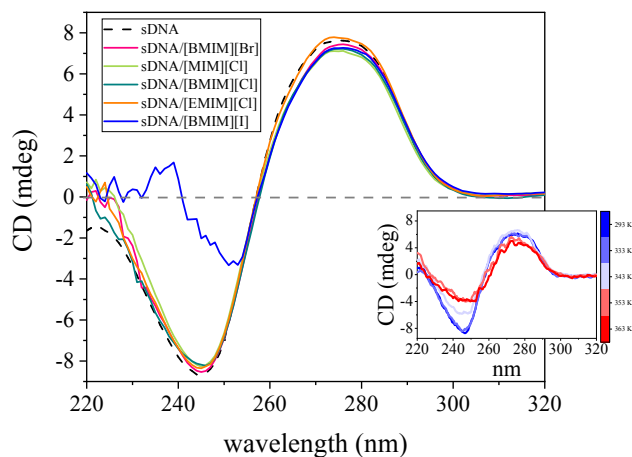

Figure S3: Comparison between Circular Dichroism (CD) spectra of sDNA in absence and presence of ILs measured at room temperature. Inset: CD spectra of sDNA recorded at different temperatures.

Table S1: unstacking temperature  $T_{us}$  obtained for sDNA in absence and presence of ILs.  $T_{us}$  values have been estimated by fitting of the experimental data of Fig 2 with eqn (1).

|               | $T_{us}$ (K)    |
|---------------|-----------------|
| sDNA in Tris  | $341.5 \pm 0.5$ |
| sDNA/[BMIM]Br | $345.0 \pm 0.8$ |
| sDNA/[BMIM]Cl | $343.9 \pm 0.9$ |
| sDNA/[BMIM]I  | $335.9 \pm 2.8$ |
| sDNA/[EMIM]Cl | $345.7 \pm 0.7$ |
| sDNA/[MIM]Cl  | $347.6 \pm 1.0$ |

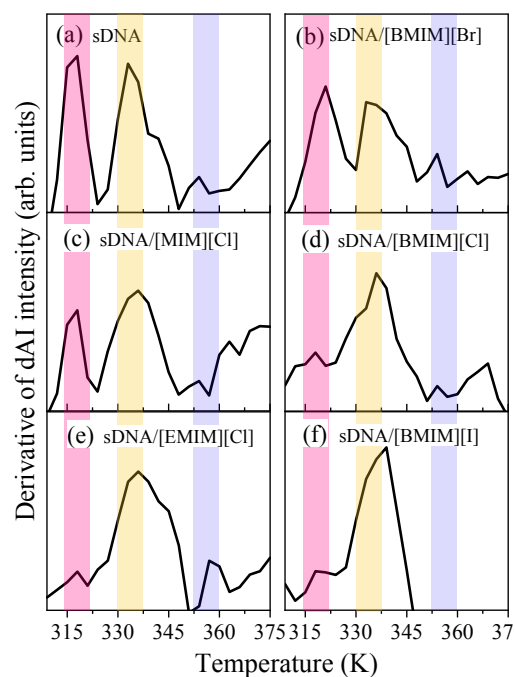

Figure S4: Temperature derivative of the intensity of dAI band for sDNA in TRIS buffer (a) and in hydrated [BMIM][Br] (b) [MIM][Cl] (c), [BMIM][Cl] (d), [EMIM][Cl] (e) and [BMIM][I] (f) in the temperature range 310-375 K. The magenta, yellow and blue strips mark the maxima corresponding to the structural transitions  $N \leftrightarrow I_1$ ,  $I_1 \leftrightarrow I_2$  and  $I_2 \leftrightarrow D$  of sDNA, respectively (see text for details).
